# Supplementary material for: An Efficient Method for Testing the Quality of Drinking-Water Filters Used for Home Necessities
Source: MDPI journal article supplement (doi:10.3390/ijerph19074085), 2022-03-30
Supplement: s1 [file s1]

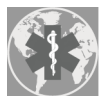

**Supplementary Materials:** The following are available online at [www.mdpi.com/xxx/s1](http://www.mdpi.com/xxx/s1), Figure S1: Optical Microscope 10 / 0.25.; Figure S2: Map of the study area.

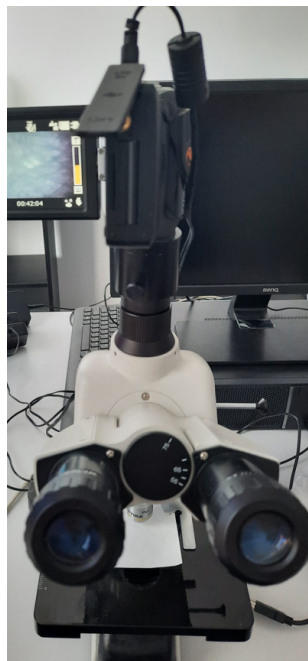

**Figure S1.** Optical Microscope 10 / 0.25.

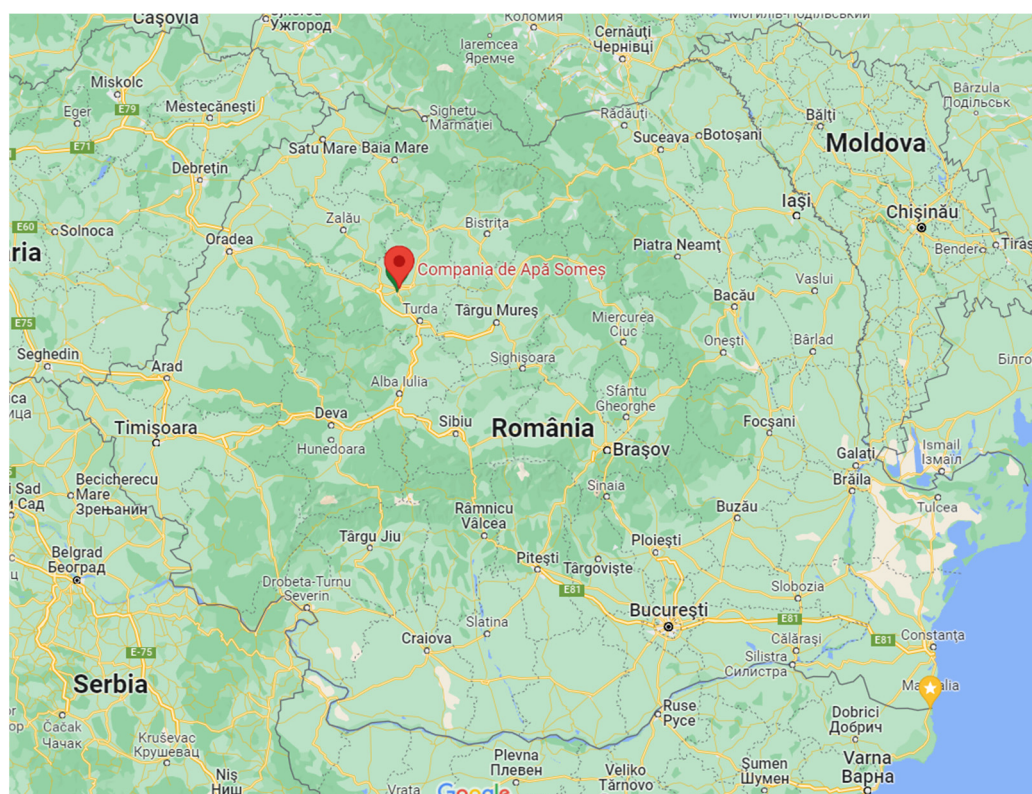

**Figure S2.** Map of the study area [31].

## References

31. Map of the study area. Available online: <https://www.google.com/maps/place/Compania+de+Ap%C4%83+Some%C8%99/@46.2363607,21.7509944,6.69z/data=!4m5!3m4!1s0x47490c1862855555:0xf81b2e004666c9a9!8m2!3d46.7760585!4d23.6050224>.
